# Supplementary material
Source: Springer Nature journal article supplement (https://www.springermedizin.de/resource/supplementary/13023_2010_298_MOESM2_ESM.pdf/9642028)

**a)**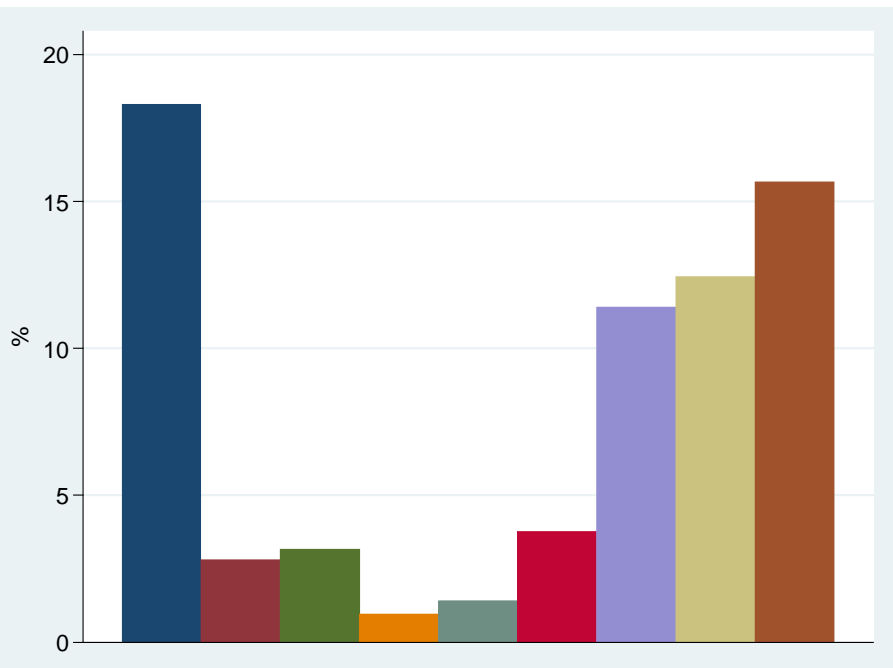**b)**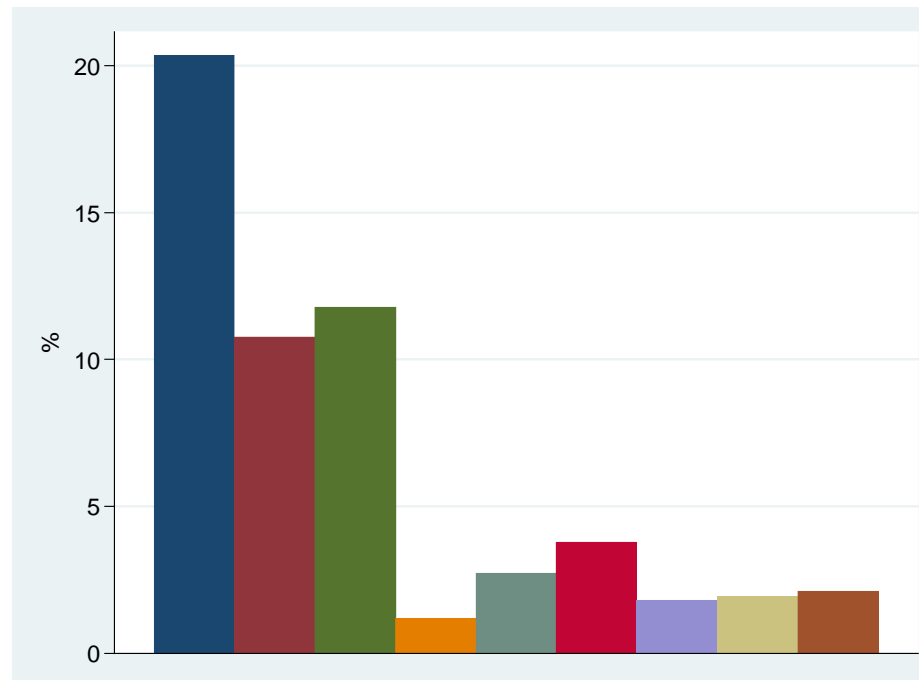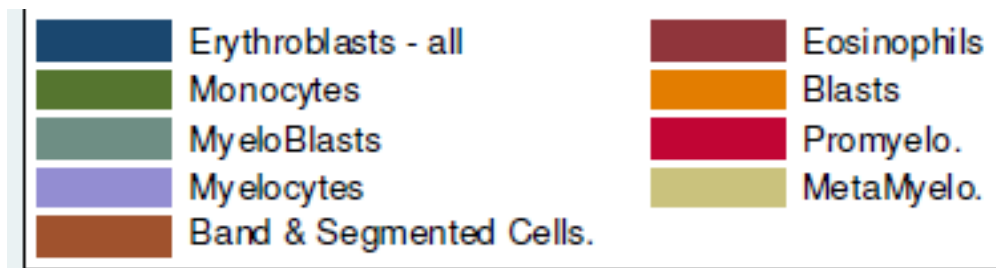

Supplement: MOESM2 [file 9642028]
